# Supplementary material
Source: publisher figshare collection journal article supplement (https://geolsoc.figshare.com/ndownloader/files/31639928)
Supplement: Supplementary file 1 [file 31639928]

# Supplementary data table 1

| **Borehole name** | **BGS reference** | **Easting (BNG)** | **Northing (BNG)** | **Year drilled** | **Net (%) sand** | **Derivation (web link)** |
| --- | --- | --- | --- | --- | --- | --- |
| Alnwick | NU11SW10 | 414620 | 612100 | - | 99 | Turner *et al*. (1997)  BGS Geoindex Onshore ([scans.bgs.ac.uk/](http://scans.bgs.ac.uk/sobi_scans/boreholes/624750/images/12422472.html)) |
| Berwick Waterworks | NT95SE6 | 399770 | 652110 | 1904 | 68 | BGS Geoindex Onshore ([scans.bgs.ac.uk/](http://scans.bgs.ac.uk/sobi_scans/boreholes/736662/images/12422674.html)) |
| Brafferton | NZ22SE105 | 428432 | 521493 | 1989 | 26 | UK Oil and Gas Authority (OGA) |
| Easton | NY47SW15 | 344124 | 571694 | 1990 | 38 | OGA |
| Errington | NY97SE50 | 397740 | 571350 | 2004 | 44 | OGA |
| Fox Covert | NT95SE201 | 397294 | 650597 | 1993 | 80 | BGS Geoindex Onshore ([scans.bgs.ac.uk/](http://scans.bgs.ac.uk/sobi_scans/boreholes/20631086/images/20630762.html)) |
| Grievestead Farm (1) | NT94NW19 | 393062 | 645057 | 2010 | 51 | BGS Geoindex Onshore ([scans.bgs.ac.uk/](http://scans.bgs.ac.uk/sobi_scans/boreholes/18904955/images/19444812.html)) |
| Harton (Dome) | NZ36NE80 | 439660 | 565620 | 1960 | 74 | BGS Core Store  Ridd *et al*. (1970)  BGS Geoindex Onshore ([scans.bgs.ac.uk/](http://scans.bgs.ac.uk/sobi_scans/boreholes/923323/images/12493020.html)) |
| Longframlington | NU10SW11 | 413285 | 600860 | 1964 | 95 | Turner *et al*. (1993)  BGS Geoindex Onshore ([scans.bgs.ac.uk/](http://scans.bgs.ac.uk/sobi_scans/boreholes/656726/images/12423457.html)) |
| Longhorsley | NZ19SW6 | 414441 | 592548 | 1986 | 70 | OGA |
| Longridge Towers | NT95SE11 | 395850 | 650010 | 1942 | 51 | BGS Geoindex Onshore ([scans.bgs.ac.uk/](http://scans.bgs.ac.uk/sobi_scans/boreholes/736667/images/12422719.html)) |
| New Murton | NT94NE14 | 396640 | 648950 | 1972 | 53 | BGS Geoindex Onshore ([scans.bgs.ac.uk/](http://scans.bgs.ac.uk/sobi_scans/boreholes/624750/images/12422472.html)) |
| Newcastle Science Central (Deep Geothermal Borehole) | NZ26SW3569 | 424010 | 564330 | 2011 | 46 | Younger *et al*. (2016) |
| Seal Sands | NZ52SW308 | 453796 | 523805 | 1974 | 48 | BGS Core Store  Johnson *et al*. (2011) |
| Shoreswood | NT94NW12 | 394527 | 646667 | 1990 | 42 | BGS Geoindex Onshore ([scans.bgs.ac.uk/](http://scans.bgs.ac.uk/sobi_scans/boreholes/613602/images/12422545.html)) |
| Simpson Naltings Berwick | NT95SE4 | 398800 | 651920 | 1961 | 51 | BGS Geoindex Onshore ([scans.bgs.ac.uk/](http://scans.bgs.ac.uk/sobi_scans/boreholes/736660/images/12422660.html)) |
| Stonehaugh | NY77NE2 | 378990 | 576190 | 1975 | 42 | BGS Core Store  Smith and Holliday (1991)  BGS Geoindex Onshore ([scans.bgs.ac.uk/](http://scans.bgs.ac.uk/sobi_scans/boreholes/608477/images/12444986.html)) |
| Thorton Bog | NT94NE22 | 395500 | 647900 | - | 80 | BGS Geoindex Onshore ([scans.bgs.ac.uk/](http://scans.bgs.ac.uk/sobi_scans/boreholes/624758/images/12422523.html)) |
| Tweedside Trading Estate | NT95SE200 | 398714 | 652078 | 2018 | 48 | BGS Geoindex Onshore ([scans.bgs.ac.uk/](http://scans.bgs.ac.uk/sobi_scans/boreholes/20630362/images/20630358.html)) |
| Westnewton | NY14SW32 | 312300 | 543550 | 1989 | 14 | OGA |

Table 1: Borehole data with derivation and web links.

# References

Turner, B.R., Dewey, C. and Fordham, C.E., 1997. Marine ostracods in the Lower Carboniferous fluviatile Fell Sandstone Group: evidence for base level change and marine flooding of the central graben, Northumberland Basin. *Proceedings of the Yorkshire Geological Society, 51*(4), pp.297-306. <https://doi.org/10.1144/pygs.51.4.297>

Ridd, M.F., Walker, D.B. and Jones, J.M., 1970. A deep borehole at Harton on the margin of the Northumbrian Trough. *Proceedings of the Yorkshire Geological Society, 38*(1), pp.75-103. <https://doi.org/10.1144/pygs.38.1.75>

Turner, B.R., Younger, P.L. and Fordham, C.E., 1993. Fell Sandstone lithostratigraphy south-west of Berwick-upon-Tweed: implications for the regional development of the Fell Sandstone. *Proceedings of the Yorkshire Geological Society, 49*(4), pp.269-281. <https://doi.org/10.1144/pygs.49.4.269>

Younger, P.L., Manning, D.A., Millward, D., Busby, J.P., Jones, C.R. and Gluyas, J.G., 2016. Geothermal exploration in the Fell Sandstone Formation (Mississippian) beneath the city centre of Newcastle upon Tyne, UK: the Newcastle Science Central deep geothermal borehole. *Quarterly Journal of Engineering Geology and Hydrogeology*, *49*(4), pp.350-363. <https://doi.org/10.1144/qjegh2016-053>

Johnson, G.A.L., Somerville, I.D., Tucker, M.E. and Cózar, P., 2011, May. Carboniferous stratigraphy and context of the Seal Sands No. 1 Borehole, Teesmouth, NE England: the deepest onshore borehole in Great Britain. *Proceedings of the Yorkshire Geological Society, 58*(3), pp. 173-196. <https://doi.org/10.1144/pygs.58.3.231>

Smith, S.A. and Holliday, D.W., 1991. The sedimentology of the middle and upper border groups (Viséan) in the stonehaugh borehole, Northumberland. *Proceedings of the Yorkshire Geological Society, 48*(4), pp.435-446. <https://doi.org/10.1144/pygs.48.4.435>
